# Supplementary material
Source: publisher site journal article supplement (https://www.dovepress.com/get_supplementary_file.php?f=163139b.xlsx)
Supplement: Supplementary file 1 [file get_supplementary_file.php]

## Sheet: Sheet1
gender	male	female
group1	55	29
group2	37	43
group3	5	9
smoking_history	<=2	<=3	>3
group1	38	15	1
group2	12	1	36
group3	39	13	22
	89	29	59
alcohol_consumption_frequency	<=3	<=5	>5
group1	11	7	3
group2	2	1	9
group3	1	0	5
history_chronic_pancreatitis	yes	no
group1	10	63
group2	2	57
group3	1	10
history_other_malignancy	Yes	No
group1	9	75
group2	8	72
group3	2	12
tumor_grade	G1	G2	G3	G4	Gx
group1	19	46	15	2	0
group2	14	41	24	0	2
group3	2	10	2	0	1
tumor_resected_max_dimension	<=3	<=6	>6
group1	47	12	3
group2	25	43	6
group3	7	4	0
treatment_outcome_first_course	Complete Remission	Partial Remission	Stable Disease	Progressive Disease	Discrepancy
group1	25	15	6	1	3
group2	15	20	2	15	1
group3	3	0	0	3	0
